# Supplementary material
Source: PubMed Central journal article supplement (PMC6683715)
Supplement: ASN.2018101054SupplementaryData.pdf [file ASN.2018101054SupplementaryData.pdf]

## Supplements

### **Genetic identification of two novel loci associated with steroid-sensitive nephrotic syndrome**

1 Stephanie Dufek\*, 1 Chris Cheshire\*, 1 Adam P Levine\*, 1 Richard S Trompeter\*, 1 Naomi Issler, 1 Matthew Stubbs, 1 Monika Mozere, 1 Sanjana Gupta, 1 Enriko Klootwijk, 1 Vaksha Patel, 2 Daljit Hothi, 2 Aoife Waters, 2 Hazel Webb, 2 Kjell Tullus, 2 Lucy Jenkins, 2 Lighta Godinho, 3 Elena Levtchenko, 4 Jack Wetzels, 5 Nine Knoers, 6 Nynke Teeninga, 6 Jeroen Nauta, 7 Mohamed Shalaby, 7 Sherif Eldesoky, 7 Jameela A Kari, 8 Shenal Thalgahagoda, 8 Randula Ranawaka, 8 Asiri Abeyagunawardena, 9 Adebowale Adeyemo, 10 Mark Kristiansen, 11 Rasheed Gbadegesin, 12 Nicholas J Webb, 1 Daniel P Gale\*, 1 Horia C Stanescu\*, 1 Robert Kleta\*, 1 Detlef Bockenhauer\*

\* contributed equally

#### Affiliations:

1. Department of Renal Medicine, University College London, London, UK
2. Great Ormond Street Hospital for Children NHS Foundation Trust, London, UK
3. University Hospitals Leuven & University of Leuven, Leuven, Belgium
4. Nephrology, Radboud University Medical Center, Nijmegen, The Netherlands
5. Department of Genetics, UMC Groningen, Groningen, The Netherlands
6. Department of Pediatric Nephrology, Erasmus University Medical Centre-Sophia Children's Hospital, Rotterdam, The Netherlands
7. Pediatric Nephrology Center of Excellence, King Abdulaziz University, Jeddah, Kingdom of Saudi Arabia
8. Department of Paediatrics, University of Peradeniya, Sri Lanka
9. NHGRI, NIH, Bethesda, MD, USA
10. UCL Genomics, Institute of Child Health, UCL, London, UK
11. Department of Pediatrics, Duke University School of Medicine, Durham, NC, USA
12. Department of Paediatric Nephrology & NIHR Manchester Clinical Research Facility, Manchester Academic Health Science Centre, Royal Manchester Children's Hospital, Manchester, UK

#### Corresponding Authors:

Detlef Bockenhauer, [d.bockenhauer@ucl.ac.uk](mailto:d.bockenhauer@ucl.ac.uk) & Robert Kleta, [r.kleta@ucl.ac.uk](mailto:r.kleta@ucl.ac.uk)  
UCL Department of Renal Medicine  
Rowland Hill Street, London NW3 2PF, UK  
phone: +44 (0)20 7314 7554; fax: +44 (0)20 7472 6476

## Table of Contents

|                                                                                                  |           |
|--------------------------------------------------------------------------------------------------|-----------|
| <b>SUPPLEMENTARY MATERIAL AND METHODS</b>                                                        | <b>3</b>  |
| CASE DEFINITION                                                                                  | 3         |
| CASE COLLECTION                                                                                  | 3         |
| CONTROL COHORTS                                                                                  | 4         |
| GENOTYPING                                                                                       | 4         |
| POST GENOTYPING PROCESSING                                                                       | 5         |
| QUALITY CONTROL                                                                                  | 5         |
| ANCESTRY SELECTION                                                                               | 8         |
| IMPUTATION                                                                                       | 9         |
| GWAS METHODS AND CONDITIONAL ANALYSIS                                                            | 9         |
| HLA TYPE IMPUTING AND ASSOCIATION TESTING                                                        | 10        |
| eQTL ANALYSIS                                                                                    | 11        |
| CALCULATION OF GENETIC RISK SCORES                                                               | 11        |
| <b>SUPPLEMENTARY RESULTS</b>                                                                     | <b>12</b> |
| CONDITIONAL HLA ANALYSIS                                                                         | 12        |
| GWAS POWER CALCULATION                                                                           | 12        |
| CALCULATION OF GENETIC RISK SCORES                                                               | 12        |
| <b>ACKNOWLEDGEMENTS</b>                                                                          | <b>13</b> |
| <b>SUPPLEMENTARY REFERENCES</b>                                                                  | <b>25</b> |
| <b>SUPPLEMENTARY TABLES</b>                                                                      | <b>28</b> |
| SUPPLEMENTARY TABLE 1: EFFECT ESTIMATES FOR THE THREE LEAD GENOTYPED SNPs AT THE ASSOCIATED LOCI | 28        |
| SUPPLEMENTARY TABLE 2: LINKAGE EQUILIBRIUM AT THE CHROMOSOME 4Q13.3 LOCUS                        | 29        |
| SUPPLEMENTARY TABLE 3: LIST OF SNPs WITH A SUGGESTIVE ASSOCIATION                                | 30        |
| <b>SUPPLEMENTARY FIGURES</b>                                                                     | <b>31</b> |
| SUPPLEMENTARY FIGURE 1. FLOWCHART OF QUALITY CONTROL STEPS AND GWAS                              | 31        |
| SUPPLEMENTARY FIGURE 2. RESULTS OF CLASSICAL HLA TYPE ASSOCIATION ANALYSIS                       | 32        |
| SUPPLEMENTARY FIGURE 3. LOCUS ZOOM PLOT OF THE ASSOCIATION ON CHROMOSOME 4                       | 34        |
| SUPPLEMENTARY FIGURE 4. PRINCIPAL COMPONENT ANALYSIS OF CASES AND CONTROLS                       | 35        |
| SUPPLEMENTARY FIGURE 5. MANHATTAN PLOT WITH GENOTYPED MARKERS ONLY                               | 37        |
| SUPPLEMENTARY FIGURE 6. LOCUS ZOOM PLOT WITH GENOTYPED MARKERS ONLY FOR THE HLA LOCUS            | 38        |
| SUPPLEMENTARY FIGURE 7. LOCUS ZOOM PLOT WITH GENOTYPED MARKERS ONLY FOR THE CALHM6 LOCUS         | 39        |
| SUPPLEMENTARY FIGURE 8. LOCUS ZOOM PLOT WITH GENOTYPED MARKERS ONLY FOR THE CHR. 4Q13.3 LOCUS    | 40        |
| SUPPLEMENTARY FIGURE 9: LINKAGE DISEQUILIBRIUM OF SNP IN THE HLA REGION ASSOCIATED WITH SSNS     | 41        |
| <b>SUMMARY STATISTICS</b>                                                                        | <b>42</b> |

## Supplementary material and methods

### Case definition

All cases had childhood onset of nephrotic syndrome and the criteria for diagnosis with nephrotic syndrome were defined as per standard guidelines: presence of proteinuria (40 mg/m<sup>2</sup>/day or protein/creatinine ratio > 200 mg/mmol), hypoalbuminemia < 25 g/L and edema.<sup>1</sup> Steroid sensitive was defined as response to steroid treatment within four weeks of treatment, according to international guidelines.<sup>1</sup>

All patients who did not respond to steroid treatment within four weeks of therapy and therefore were by definition steroid resistant were excluded. Patients who had nephrotic syndrome secondary to infectious agents, malignancies, medications, and other conditions were also excluded.<sup>1</sup>

### Case collection

A total of 712 cases were collected by the authors including from the PREDNOS (EudraCT 2010-022489-29) and PREDNOS2 (EudraCT 2012-003476-39) trials.<sup>2</sup> After selection for European ancestry, 422 cases remained for analysis of which 140 were female and 282 male, consistent with the reported 1 : 2 female : male ratio in childhood SSNS.<sup>3</sup> Of the 422 cases, 212 were from the PREDNOS and PREDNOS2 trials and the remainder submitted by the participating clinicians.

Genomic DNA was extracted from peripheral blood following a standard protocol. Full consent for DNA collection was obtained by each collaborator. Ethical approval was granted by host institutions according to local guidelines.

### **Control cohorts**

Ethnicity matched controls were obtained from three different sources:

1. An “Oxford” dataset available through the European Genome Archive (EGAD00010000144 and EGAD00010000520) provided data from 432 individuals. Genotyping was performed as described.<sup>4, 5</sup>
2. “CEU Illumina ethnicity” controls were obtained from Illumina and provided data from 90 individuals genotyped as described previously (<http://www.illumina.com>).<sup>6</sup>
3. Wellcome Trust Case Control Consortium (WTCCC) controls. This is a combined dataset comprising the 1958 UK birth cohort controls and the UK blood service control group controls (Consortium #251), a total of 5,604 individuals. Genotyping was performed as described previously and data are available through the WTCCC website (<https://www.wtccc.org.uk>).<sup>7</sup>

### **Genotyping**

Genotyping of all cases was performed at UCL Genomics (Institute of Child Health, UCL, London, UK) on the Illumina Infinium Multi-Ethnic Global BeadChip v.A1 with 1,779,818

markers. Sample processing was carried out in accordance with the Infinium HD Ultra Assay (Part # 15023140 Rev. A) protocol (Illumina Inc, San Diego, CA, USA). Briefly, 200ng DNA was whole genome amplified (37°C for 20 hours), fragmented (37°C for 1 hour and 15 mins), precipitated and resuspended in hybridization buffer. Samples were hybridized onto Illumina array beadchips using a liquid handling robot (Freedom Evo, Tecan Ltd, Switzerland) and incubated at 48°C for 16 hours. Staining of the beadchips was also performed using a liquid handling robot (Freedom Evo, Tecan Ltd, Switzerland). Finally, the beadchips were scanned using the iScan scanner with autoloader (Illumina, San Diego, CA, USA). Data was collected in raw IDAT format.

### **Post genotyping processing**

In-house software was utilized to re-encode genotypes uniformly to the genomic forward encoding scheme following internal quality control (QC) and matching to dbSNP, based on the genotyping chip manifest and excluding indels and CNV. The final number of markers for the case dataset was 1,565,259 of which 1,513,983 were autosomal.

### **Quality control**

Standard procedures were used for QC of samples and markers.<sup>8</sup> In summary, QC per sample included removal of individuals with a call rate < 90%, removal of duplicates or related individuals (identity by descent (IBD) >0.1875), removal of samples with average identity by state distance (DST) (i.e., IBS distance (IBS2 + 0.5\*IBS1) / (N SNP pairs)) <0.66 and heterozygosity rates of more than three standard deviations below or above the mean for the overall samples. QC steps for samples and markers were carried out

independently in the cases and in each control dataset as genotyping had been performed on different SNP chips. The per sample and per SNP QC steps were subsequently repeated on the combined case-control set.

- For the cases (n=712), samples were removed because of call rate (CR) <90% (n=3), IBD >0.1875 (n=58), average DST <0.66 (n=0) and heterogeneity >3SD (n=26). Remaining for principal component analysis (PCA) were 625 individuals.
- For the Oxford controls (n=432), samples were removed because of CR <90% (n=0), IBD >0.1875 (n=6), average DST <0.66 (n=0) and heterogeneity >3SD (n=6). Remaining for PCA were 420 individuals.
- For the Illumina CEU controls (n=90), samples were removed because of CR <90% (n=0), IBD >0.1875 (n=30), average DST <0.66 (n=0) and heterogeneity >3SD (n=1). Remaining for PCA were 59 individuals.
- For the WTCCC controls (n=5604), samples were removed because of CR <90% (n=55), IBD >0.1875 (n=67), average DST <0.66 (n=0) and heterogeneity >3SD (n=82). Remaining for PCA were 5400 individuals.

After QC of the samples, the total number of cases was 625 and the total number of combined controls was 5879.

QC for markers included the removal of markers with CR <99%, markers with more than one alternate allele and markers with a minor allele frequency of <1%.<sup>9</sup> Markers in the control datasets with a significant (p-value <0.001) deviation from Hardy-Weinberg equilibrium (HWE) were removed. For controls, QC per marker was performed on each dataset separately before the control datasets were combined.

- For the cases (autosomal markers n=1,512,983), markers were removed because of CR <99% (n=222,889), minor allele frequency (MAF) <1% (n=700,397) and multiallelic (n=0). Remaining were 669,943 markers.
- For the Oxford controls (autosomal markers n=653,959), markers were removed because of CR <99% (n=13,310), MAF <1% (n=67,724), multiallelic (n=0), HWE p<0.001 (n=2,889). Remaining were 571,616 markers.
- For the Illumina CEU controls (autosomal markers n=653,959), markers were removed because of CR <99% (n=79,777), MAF <1% (n=68,185), multiallelic (n=0), HWE p<0.001 (n=1,795). Remaining were 516,372 markers.
- For the WTCCC controls (autosomal markers n=1,025,437), markers were removed because of CR <99% (n=133,778), MAF <1% (n=135,992), multiallelic (n=0), HWE p<0.001 (n=16,941). Remaining were 788,849 markers.

The number of markers in the combined control dataset was 372,137.

After combining with the case dataset, data were available for 158,314 overlapping markers. Subsequently, QC was performed on the combined case-control dataset with HWE testing on controls only. The final number of markers in the combined dataset was 158,217.

Analysis was done using SNP & Variation Suite (SVS) v8.8.1 (Golden Helix Inc., Bozeman, MT, USA; [www.goldenhelix.com](http://www.goldenhelix.com)).<sup>10</sup> The identification of duplicates and related individuals was undertaken using PRIMUS (<https://primus.gs.washington.edu/primusweb/index.html>)<sup>11</sup> following linkage disequilibrium (LD) pruning of markers.<sup>12</sup> LD pruning was performed in SVS using standard settings.

### **Ancestry selection**

PCA was used to evaluate population stratification and to select individuals of European ancestry only. Analyses were performed in SVS using genotyped data after LD pruning. Based on the distribution of cases and controls along principal component axes, European ancestry outliers were visualized and those with a standard deviation >3 from the combined dataset (cases and controls) were excluded (Supplementary Figure 1).

After QC and ancestry selection, the final dataset comprised 422 cases and 5642 controls genotyped for 158,217 markers. PCA was repeated on the final dataset to retrieve eigenvectors for the first ten (based on manual inspection of Eigen values) principal



components for use as covariates in the association analysis to adjust for finer resolution population substructure.

### **Imputation**

Imputation analysis was performed using Beagle 5.0 (<https://faculty.washington.edu/browning/beagle/beagle.html>) with the 1000 Genomes Project Phase 3 data (version 5a) as a reference panel (<ftp://ftp.1000genomes.ebi.ac.uk/vol1/ftp/release/20130502/>).<sup>13</sup> Cases and controls were imputed together using only samples and markers passing the aforementioned stringent QC. Post imputation filter was performed using bcftools (<https://samtools.github.io/bcftools/bcftools.html>) to remove those markers with Dosage R-Squared (DR2) <80%. INDELS and markers with a MAF <1%, CR <99% and those showing significant deviation from HWE ( $p < 0.001$ ) in the control individuals were removed using PLINK v1.90 beta (<https://www.cog-genomics.org/plink/1.9>).<sup>14</sup> The final dataset included 5,216,266 markers and was imported into SVS for further analysis.

### **GWAS methods and conditional analysis**

Genome-wide association analysis was performed only on those samples and markers which passed the stringent QC. For association analysis, a numerical association test under a logistic regression model was used. Association analysis was performed using both the best guess genotypes and using allelic dosages. The methods delivered comparable results and only those using the best guess genotypes are reported. The first ten principal components were included as covariates. The widely accepted p-value <

$5.0 \times 10^{-8}$  was used to declare genome-wide significance.<sup>15</sup> Association testing and the generation of the Manhattan plot were performed using SVS. The genomic inflation factor was calculated to quantify potential inflation of type I error due to stratification or technical artefacts. No substantial inflation was noted ( $\lambda = 1.027$ ).

Conditional analysis was performed using a numerical regression analysis model as per the discovery GWAS but incorporating the test SNP genotypes, in numerical form, as a covariate.

#### **HLA type imputing and association testing**

HLA imputation was performed using SNP2HLA v1.0.3 (<http://software.broadinstitute.org/mpg/snp2hla/>) with default parameters.<sup>16</sup> As input a subset of 1,189 SNPs from those selected for GWAS (post QC) and overlapping with the SNP2HLA imputation HapMap European reference dataset were used. Post imputation filtering included removal of imputed HLA types with a quality score  $R^2 < 80\%$ . A total of 100 HLA types were carried forward for further analysis. Logistic regression with adjustment for the first ten PCs of ancestry was used to test for association of each HLA allele with SSNS. If the higher resolution and lower resolution allele frequencies were the same in cases and controls, only the higher resolution results were reported. Conditional analysis of the lead HLA alleles was performed using a logistic regression model.

### **eQTL Analysis**

The following publicly available expression quantitative trait loci (eQTL) databases were queried (December 2018) to ascertain whether variants significantly associated with SSNS were known to influence the expression levels of corresponding gene products in multiple tissues: Gtex<sup>17</sup> (<https://gtexportal.org/home/>), eQTLgene<sup>18</sup> (<http://www.eqtlgen.org>), NephQTL<sup>19</sup> (<http://nephqtl.org>) and Human Kidney eQTL Atlas<sup>20</sup> (<http://susztaklab.com/eqtl>).

### **Calculation of genetic risk scores**

Genetic risk scores were calculated using Mangrove software<sup>21</sup> (<https://cran.r-project.org/web/packages/Mangrove/index.html>) for all individuals based on their genotype at the two replicated loci using the odds ratios and allele frequency, using a logistic regression model. The proportion of phenotypic variation explained by the genetic risk score was calculated using Nagelkerke's pseudo  $R^2$  with the fmsb package in R (<https://cran.r-project.org/web/packages/fmsb/index.html>).

## Supplementary results

### Conditional HLA analysis

After conditioning on HLA-DQA1\*02:01 the strongest signal came from HLA-DQA1\*01 ( $P=1.24 \times 10^{-31}$ , OR=0.31, 95% CI=0.25-0.38). After conditioning on both, HLA-DQA1\*02:01 and HLA-DQA1\*01 only HLA-DQB1\*03:03 ( $P=1.22 \times 10^{-8}$ , OR=0.38, 95% CI=0.26-0.54) and HLA-DQB1\*03 ( $P=1.69 \times 10^{-8}$ , OR=0.64, 95% CI=0.55-0.75) remained independently significant.

### GWAS power calculation

A power calculation was performed using the Michigan Genetic Association Study power calculator ([https://csg.sph.umich.edu/abecasis/gas\\_power\\_calculator/index.html](https://csg.sph.umich.edu/abecasis/gas_power_calculator/index.html)).<sup>22</sup> Comparing 422 cases with 5642 controls using  $\alpha = 5 \times 10^{-8}$  under a multiplicative model, the power to detect association of an allele with a frequency of 0.1 in controls exceeds 0.8 at a genotype relative risk (GRR) of 1.6 and power to detect the effect of more common alleles exceeds 0.8 at smaller GRRs.

### Calculation of genetic risk scores

We calculated that the two replicated loci (Chr 6p21.3 and 6q22.1) together explain approximately 11% of the risk of SSNS.

## Acknowledgements

| <b>PREDNOS Trial Management Group</b>                                                                                                |                                                   |
|--------------------------------------------------------------------------------------------------------------------------------------|---------------------------------------------------|
| Professor Nicholas Webb<br>Central Manchester University Hospitals NHS<br>Foundation Trust<br>(Royal Manchester Children's Hospital) | Chief Investigator, Applicant                     |
| Dr Richard Trompeter<br>Centre for Nephrology, University College, London                                                            | Co-Chief Investigator, Co-Applicant<br>Nephrology |
| Professor Keith Wheatley<br>University of Birmingham<br>(Cancer Research UK Clinical Trials Unit)                                    | Co-Applicant<br>Clinical Trials                   |
| Dr Carole Cummins<br>University of Birmingham<br>(Institute of Applied Health Research)                                              | Co-Applicant<br>Clinical Trials & Statistics      |
| Miss Natalie Ives<br>University of Birmingham<br>(Birmingham Clinical Trials Unit)                                                   | Co-Applicant<br>Clinical Trials & Statistics      |
| Dr Emma Frew<br>University of Birmingham<br>(Institute of Applied Health Research)                                                   | Co-Applicant<br>Health Economics                  |

| <b>PREDNOS Trial Management and Day to Day Coordination<br/>Birmingham Clinical Trials Unit, University of Birmingham</b> |                           |
|---------------------------------------------------------------------------------------------------------------------------|---------------------------|
| Elizabeth Brettell                                                                                                        | Team Leader               |
| Emma Barsoum                                                                                                              | Senior Trial Coordinator  |
| Helen Bodenham-Chilton                                                                                                    | Trial Coordinator         |
| Noreen Akhtar                                                                                                             | Trial Administrator       |
| Charmaine Hunt (previously Meek)                                                                                          | Trial Administrator       |
| Terry Hughes                                                                                                              | Data Manager              |
| Adam Khan                                                                                                                 | Data Manager              |
| Nicholas Hilken                                                                                                           | Programming Team Leader   |
| Neil Winkles                                                                                                              | Senior Analyst Programmer |
| Adrian Wilcockson                                                                                                         | Senior Analyst Programmer |
| Mark Hunter                                                                                                               | Analyst Programmer        |

| <b>PREDNOS Trial Statistics<br/>Birmingham Clinical Trials Unit, University of Birmingham</b> |                        |
|-----------------------------------------------------------------------------------------------|------------------------|
| Natalie Ives                                                                                  | Statistics Team Leader |
| Rebecca Woolley                                                                               | Trial Statistician     |
| Andrew Howman                                                                                 | Trial Statistician     |
| Natalie Marchevsky                                                                            | Statistician           |

| <b>PREDNOS Trial Health Economics</b>                                           |                       |
|---------------------------------------------------------------------------------|-----------------------|
| Emma Frew<br>University of Birmingham<br>(Institute of Applied Health Research) | Health Economics Lead |
| Tosin Lambe                                                                     | Health Economics      |

|                                                                                         |                                                                    |
|-----------------------------------------------------------------------------------------|--------------------------------------------------------------------|
| University of Birmingham<br>(Institute of Applied Health Research)                      |                                                                    |
| Associated Professor Billingsley Kaambwa<br>Flinders University<br>(School of Medicine) | Health Economics (original Health Economics Lead and co-applicant) |

|                                                                                         |                                                                                  |
|-----------------------------------------------------------------------------------------|----------------------------------------------------------------------------------|
| <b>Participating centres and PREDNOS collaborative group members</b>                    |                                                                                  |
| <b>Abertawe Bro Morgannwg University Health Board</b>                                   |                                                                                  |
| Morrison Hospital                                                                       |                                                                                  |
| Dr Michelle James-Ellison                                                               | Principal Investigator                                                           |
| Hilary Marie Williams                                                                   | Research Nurse                                                                   |
| <b>Airedale NHS Foundation Trust</b>                                                    |                                                                                  |
| Airedale General Hospital                                                               |                                                                                  |
| Dr Pronab Bala                                                                          | Principal Investigator                                                           |
| <b>Alder Hey Children's NHS Foundation Trust</b>                                        |                                                                                  |
| Alder Hey Children's Hospital                                                           |                                                                                  |
| Dr Caroline Jones                                                                       | Principal Investigator                                                           |
| Dr Richard Holt                                                                         | Clinician                                                                        |
| Dr Henry Morgan                                                                         | Clinician                                                                        |
| Elizabeth Bailey                                                                        | Research Nurse                                                                   |
| Lauren Flanagan                                                                         | Data Manager                                                                     |
| <b>Ashford and St Peter's Hospitals NHS Foundation Trust</b>                            |                                                                                  |
| St Peter's Hospital                                                                     |                                                                                  |
| Dr Tariq Bhatti                                                                         | Principal Investigator                                                           |
| Dr Shailini Bahl                                                                        | Clinician                                                                        |
| Lorna Walding                                                                           | Research Nurse                                                                   |
| <b>Barnsley Hospital NHS Foundation Trust</b>                                           |                                                                                  |
| Barnsley Hospital                                                                       |                                                                                  |
| Dr Ezzedin Gouta                                                                        | Principal Investigator                                                           |
| Dr Rajeev Gupta                                                                         | Clinician                                                                        |
| Dr Diarmuid Kerrin                                                                      | Clinician                                                                        |
| <b>Barts Health NHS Trust</b>                                                           |                                                                                  |
| Newham University Hospital, The Royal London Hospital, Whipps Cross University Hospital |                                                                                  |
| Dr Ami Parikh                                                                           | Principal Investigator                                                           |
| Dr Ann Duthie                                                                           | Previous Principal Investigator; Clinician<br>(Whipps Cross University Hospital) |
| Dr Nimze Gadong                                                                         | Previous Principal Investigator; Clinician<br>(Newham University Hospital)       |
| Dr Bahadur Anjum                                                                        | Clinician (Newham University Hospital)                                           |
| Bessie Crone                                                                            | Research Nurse                                                                   |
| Hilarious De Jesus                                                                      | Research Nurse (The Royal London Hospital)                                       |
| Ivone Lancoma-Malcolm                                                                   | Research Nurse (Newham University Hospital)                                      |
| Nicolene Plaatjies                                                                      | Research Nurse (Newham University Hospital,<br>The Royal London Hospital)        |
| <b>Basildon and Thurrock University Hospitals NHS Foundation Trust</b>                  |                                                                                  |
| Basildon University Hospital                                                            |                                                                                  |
| Dr Khorshid Khalifa                                                                     | Principal Investigator                                                           |
| <b>Belfast Health and Social Care Trust</b>                                             |                                                                                  |
| The Royal Belfast Hospital for Sick Children                                            |                                                                                  |

|                                                                                                                                                   |                                                                                                                                                                                                                   |
|---------------------------------------------------------------------------------------------------------------------------------------------------|-------------------------------------------------------------------------------------------------------------------------------------------------------------------------------------------------------------------|
| Dr Karl McKeever<br>Dr Grace McCall<br>Patricia McCreesh<br>Muriel Millar                                                                         | Principal Investigator<br>Clinician<br>Research Nurse<br>Research Nurse                                                                                                                                           |
| <b>Betsi Cadwaladr University Health Board</b>                                                                                                    |                                                                                                                                                                                                                   |
| Glan Clwyd Hospital, Ysbyty Gwynedd                                                                                                               |                                                                                                                                                                                                                   |
| Dr Markus Hesselning<br>Dr Madalitso Kubwalo<br>Annette Bolger<br>Lucie Hobson                                                                    | Principal Investigator (Glan Clwyd Hospital)<br>Principal Investigator (Ysbyty Gwynedd)<br>Research Officer<br>Research Nurse                                                                                     |
| <b>Birmingham Women's and Children's NHS Foundation Trust</b>                                                                                     |                                                                                                                                                                                                                   |
| Birmingham Children's Hospital                                                                                                                    |                                                                                                                                                                                                                   |
| Dr David Milford<br>Dr Larissa Kerecuk<br>Claire Norton<br>Narinder Rahania<br>Helen Williamson<br>Fatima Bibi<br>Tracy Gazeley<br>Julie Williams | Principal Investigator<br>Clinician<br>Central Pharmacist<br>Central Pharmacist<br>Central Pharmacist<br>Central Pharmacy Clinical Trials Assistant<br>Central Pharmacy Technician<br>Central Pharmacy Technician |
| <b>Bolton NHS Foundation Trust</b>                                                                                                                |                                                                                                                                                                                                                   |
| Royal Bolton Hospital                                                                                                                             |                                                                                                                                                                                                                   |
| Dr Fiona Watson<br>Claire Abbot                                                                                                                   | Principal Investigator<br>Research Nurse                                                                                                                                                                          |
| <b>Bradford Teaching Hospitals NHS Foundation Trust</b>                                                                                           |                                                                                                                                                                                                                   |
| Bradford Royal Infirmary                                                                                                                          |                                                                                                                                                                                                                   |
| Dr Simon Frazer<br>Louise Akeroyd                                                                                                                 | Principal Investigator<br>Research Nurse                                                                                                                                                                          |
| <b>Burton Hospitals NHS Foundation Trust</b>                                                                                                      |                                                                                                                                                                                                                   |
| Queen's Hospital                                                                                                                                  |                                                                                                                                                                                                                   |
| Dr Mansoor Ahmed<br>Dr Dominic Muogbo<br>Claire Backhouse<br>Stephanie Boswell                                                                    | Principal Investigator<br>Clinician<br>Research Nurse<br>Research Nurse                                                                                                                                           |
| <b>Calderdale and Huddersfield NHS Foundation Trust</b>                                                                                           |                                                                                                                                                                                                                   |
| Calderdale Royal Hospital, Huddersfield Royal Infirmary                                                                                           |                                                                                                                                                                                                                   |
| Dr Eilean Crosbie                                                                                                                                 | Principal Investigator                                                                                                                                                                                            |
| <b>Cambridge University Hospitals NHS Foundation Trust</b>                                                                                        |                                                                                                                                                                                                                   |
| Addenbrooke's Hospital                                                                                                                            |                                                                                                                                                                                                                   |
| Dr Peter Heinz<br>Dr Birgit Ulbrich                                                                                                               | Principal Investigator<br>Clinician                                                                                                                                                                               |
| <b>Cardiff and Vales University Health Board</b>                                                                                                  |                                                                                                                                                                                                                   |
| University Hospital of Wales                                                                                                                      |                                                                                                                                                                                                                   |
| Dr Shivaram Hegde<br>Pauline Jones                                                                                                                | Principal Investigator<br>Research Nurse                                                                                                                                                                          |
| <b>Central Manchester University Hospitals NHS Foundation Trust</b>                                                                               |                                                                                                                                                                                                                   |
| Royal Manchester Children's Hospital                                                                                                              |                                                                                                                                                                                                                   |
| Professor Nicholas JA Webb<br>Dr Rachel Lennon                                                                                                    | Chief Investigator; Principal Investigator<br>Clinician; Laboratory                                                                                                                                               |

|                                                                        |                        |
|------------------------------------------------------------------------|------------------------|
| Dr Malcolm Lewis                                                       | Clinician              |
| Dr Nicholas Plant                                                      | Clinician              |
| Dr Mohan Shenoy                                                        | Clinician              |
| Dr Shaila Sukthankar                                                   | Clinician              |
| Charlotte Bryant                                                       | Research Coordinator   |
| Sarah Douglas                                                          | Research Coordinator   |
| Helen Sumner                                                           | Research Coordinator   |
| Jane Howell                                                            | Research Nurse         |
| <b>Chelsea and Westminster Hospital NHS Foundation Trust</b>           |                        |
| West Middlesex University Hospital                                     |                        |
| Dr Nour Elhadi                                                         | Principal Investigator |
| Irene Bishton                                                          | Research Nurse         |
| <b>Chesterfield Royal Hospital NHS Foundation Trust</b>                |                        |
| Chesterfield Royal Hospital                                            |                        |
| Dr Oyekunle Ayonrinde                                                  | Principal Investigator |
| <b>Colchester Hospital University NHS Foundation Trust</b>             |                        |
| Colchester General Hospital                                            |                        |
| Dr Andrea Turner                                                       | Principal Investigator |
| Dr Jonathan Campbell                                                   | Clinician              |
| Aine Turner                                                            | Research Nurse         |
| <b>Countess of Chester Hospital NHS Foundation Trust</b>               |                        |
| Countess of Chester Hospital                                           |                        |
| Dr John Gibbs                                                          | Principal Investigator |
| Dr Elizabeth Newby                                                     | Clinician              |
| Dr Satyanarayana Saladi                                                | Clinician              |
| Dr Alison Timmis                                                       | Clinician              |
| Caroline Burchett                                                      | Research Nurse         |
| Sarah De-Beger                                                         | Research Assistant     |
| <b>County Durham and Darlington NHS Foundation Trust</b>               |                        |
| Darlington Memorial Hospital, University Hospital of North Durham      |                        |
| Dr Asha Nair                                                           | Principal Investigator |
| Dr Antima Banerjee                                                     | Clinician              |
| <b>Croydon Health Services NHS Trust</b>                               |                        |
| Croydon University Hospital                                            |                        |
| Dr Theo Fenton                                                         | Principal Investigator |
| <b>Dartford and Gravesham NHS Trust</b>                                |                        |
| Darent Valley Hospital                                                 |                        |
| Dr Selwyn D'Costa                                                      | Principal Investigator |
| <b>Derby Teaching Hospitals NHS Foundation Trust</b>                   |                        |
| Royal Derby Hospital                                                   |                        |
| Dr Richard Bowker                                                      | Principal Investigator |
| Coral Smith                                                            | Research Nurse         |
| Vanessa Unsworth                                                       | Research Nurse         |
| <b>Doncaster and Bassetlaw Teaching Hospitals NHS Foundation Trust</b> |                        |
| Bassetlaw Hospital, Doncaster Royal Infirmary                          |                        |
| Dr Anuja Natarajan                                                     | Principal Investigator |
| Dr Lai Men Wong                                                        | Clinician              |
| <b>Dorset County Hospital NHS Foundation Trust</b>                     |                        |
| Dorset County Hospital                                                 |                        |



|                                                                       |                                    |
|-----------------------------------------------------------------------|------------------------------------|
| Dr Phil Parslow                                                       | Principal Investigator             |
| <b>East and North Hertfordshire NHS Trust</b>                         |                                    |
| Lister Hospital                                                       |                                    |
| Dr Vijay Kandala                                                      | Principal Investigator             |
| Dr Salman Imran                                                       | Previous Principal Investigator    |
| <b>East Cheshire NHS Trust</b>                                        |                                    |
| Macclesfield District General Hospital                                |                                    |
| Dr Surendran Chandrasekaran                                           | Principal Investigator             |
| Dr Sheng-Ang Ho                                                       | Previous Principal Investigator    |
| Dr Ignatius Losa                                                      | Clinician                          |
| Dr Katrina Marinaki                                                   | Clinician                          |
| Natalie Keenan                                                        | Research Nurse                     |
| Jessica Nichols                                                       | Research Nurse                     |
| Joanne Shippey                                                        | Research Nurse                     |
| <b>East Lancashire Hospitals NHS Trust</b>                            |                                    |
| Royal Blackburn Hospital                                              |                                    |
| Dr Javed Iqbal                                                        | Principal Investigator             |
| <b>Epsom and St Helier University Hospitals NHS Trust</b>             |                                    |
| Epsom Hospital                                                        |                                    |
| Dr Kirsty Watts                                                       | Principal Investigator             |
| <b>Frimley Health NHS Foundation Trust</b>                            |                                    |
| Wexham Park Hospital                                                  |                                    |
| Dr Angela Yannoulis                                                   | Principal Investigator             |
| Dr Zilla Huma                                                         | Previous Principal Investigator    |
| <b>Gloucestershire Hospitals NHS Foundation Trust</b>                 |                                    |
| Gloucestershire Royal Hospital                                        |                                    |
| Dr Adamu Sambo                                                        | Principal Investigator             |
| Dr Lyda Jadresic                                                      | Previous Principal Investigator    |
| Susan Beames                                                          | Research Nurse                     |
| <b>Great Ormond Street Hospital for Children NHS Foundation Trust</b> |                                    |
| Great Ormond Street Hospital                                          |                                    |
| Professor Detlef Bockenhauer                                          | Principal Investigator; Laboratory |
| Dr Daljit Hothi                                                       | Previous Principal Investigator    |
| <b>Great Western Hospitals NHS Foundation Trust</b>                   |                                    |
| Great Western Hospital                                                |                                    |
| Dr Nick West                                                          | Principal Investigator             |
| Dr Helen Price                                                        | Previous Principal Investigator    |
| <b>Guy's and St Thomas' NHS Foundation Trust</b>                      |                                    |
| Evelina London Children's Hospital                                    |                                    |
| Dr Manish Sinha                                                       | Principal Investigator             |
| Emma Neal                                                             | Research Nurse                     |
| Elisabeth Reus                                                        | Research Nurse                     |
| Paula Sofocleous                                                      | Research Nurse                     |
| <b>Harrogate and District NHS Foundation Trust</b>                    |                                    |
| Harrogate District Hospital                                           |                                    |
| Dr Ian Cannings                                                       | Principal Investigator             |
| <b>Homerton University Hospital NHS Foundation Trust</b>              |                                    |
| Homerton University Hospital                                          |                                    |
| Dr Rajiv Sood                                                         | Principal Investigator             |

|                                                           |                                 |
|-----------------------------------------------------------|---------------------------------|
| <b>Hull and East Yorkshire Hospitals NHS Trust</b>        |                                 |
| Hull Royal Infirmary                                      |                                 |
| Dr Verghese Mathew                                        | Principal Investigator          |
| Dr Elsadeg Sharif                                         | Previous Principal Investigator |
| <b>Kettering General Hospital NHS Foundation Trust</b>    |                                 |
| Kettering General Hospital                                |                                 |
| Dr Harsha Bilolikar                                       | Principal Investigator          |
| Sonia White                                               | Research Nurse                  |
| <b>Kingston Hospital NHS Foundation Trust</b>             |                                 |
| Kingston Hospital                                         |                                 |
| Dr Titi Ayeni                                             | Principal Investigator          |
| <b>Lancashire Teaching Hospitals NHS Foundation Trust</b> |                                 |
| Royal Preston Hospital                                    |                                 |
| Dr Ruth O'Connor                                          | Principal Investigator          |
| <b>Luton and Dunstable Hospital NHS Foundation Trust</b>  |                                 |
| Luton and Dunstable University Hospital                   |                                 |
| Dr Michael Eisenhut                                       | Principal Investigator          |
| Dr Tomasz Rajkowski                                       | Clinician                       |
| Samantha Clough                                           | Research Nurse                  |
| Rebecca Dixon                                             | Research Nurse                  |
| Karen Reep                                                | Research Nurse                  |
| <b>Maidstone and Tunbridge Wells NHS Trust</b>            |                                 |
| Maidstone Hospital, Tunbridge Wells Hospital              |                                 |
| Dr Krishnan Balasubramanian                               | Principal Investigator          |
| Dr Hamudi Kisat                                           | Clinician                       |
| <b>Medway NHS Foundation Trust</b>                        |                                 |
| Medway Maritime Hospital                                  |                                 |
| Dr Janette Cansick                                        | Principal Investigator          |
| <b>Mid Cheshire Hospitals NHS Foundation Trust</b>        |                                 |
| Leighton Hospital                                         |                                 |
| Dr Julie Ellison                                          | Principal Investigator          |
| Sally Smith                                               | Research Nurse                  |
| Samantha Tapscott                                         | Research Nurse                  |
| <b>NHS Ayrshire and Arran</b>                             |                                 |
| University Hospital Crosshouse                            |                                 |
| Dr Bridget Oates                                          | Principal Investigator          |
| Claire Bell                                               | Research Nurse                  |
| <b>NHS Dumfries &amp; Galloway</b>                        |                                 |
| Dumfries and Galloway Royal Infirmary                     |                                 |
| Dr Rajendran Shyam                                        | Principal Investigator          |
| <b>NHS Fife</b>                                           |                                 |
| Victoria Hospital                                         |                                 |
| Dr Evelyn Menzies                                         | Principal Investigator          |
| Pamela Cruickshanks                                       | Clinical Nurse Specialist       |
| <b>NHS Forth Valley</b>                                   |                                 |
| Forth Valley Royal Hospital                               |                                 |
| Dr John Schulga                                           | Principal Investigator          |
| <b>NHS Grampian</b>                                       |                                 |
| Royal Aberdeen Children's Hospital                        |                                 |

|                                                                      |                                                               |
|----------------------------------------------------------------------|---------------------------------------------------------------|
| Dr Craig Oxley                                                       | Principal Investigator                                        |
| <b>NHS Greater Glasgow and Clyde</b>                                 |                                                               |
| Royal Alexandra Hospital, Royal Hospital for Children                |                                                               |
| Dr David Hughes                                                      | Principal Investigator (Royal Hospital for Children)          |
| Dr Amita Sharma                                                      | Principal Investigator (Royal Alexandra Hospital)             |
| Dr Leah Krischock                                                    | Previous Principal Investigator (Royal Hospital for Children) |
| Dr Jamie Houston                                                     | Clinician (Royal Alexandra Hospital)                          |
| Diane Carroll                                                        | Research Nurse (Royal Hospital for Children)                  |
| Sheryl Goddard                                                       | Research Nurse (Royal Hospital for Children)                  |
| Elizabeth Waxman                                                     | Research Nurse                                                |
| <b>NHS Highland</b>                                                  |                                                               |
| Raigmore Hospital                                                    |                                                               |
| Dr Alan Webb                                                         | Principal Investigator                                        |
| <b>NHS Lanarkshire</b>                                               |                                                               |
| Wishaw General Hospital                                              |                                                               |
| Dr Thin Thin Saing                                                   | Principal Investigator                                        |
| Dr Colin Cunningham                                                  | Clinician                                                     |
| Angela Brown                                                         | Research Nurse                                                |
| Victoria Causer                                                      | Clinical Nurse Specialist                                     |
| <b>NHS Lothian</b>                                                   |                                                               |
| Royal Hospital for Sick Children                                     |                                                               |
| Dr David Hughes                                                      | Principal Investigator                                        |
| Dr Sepideh Taheri                                                    | Previous Principal Investigator                               |
| Alyson Macdonald                                                     | Clinical Nurse Specialist                                     |
| Tracey McGregor                                                      | Clinical Nurse Specialist                                     |
| Emma Carson                                                          | Research Nurse                                                |
| Kay Riding                                                           | Research Nurse                                                |
| <b>Norfolk and Norwich University Hospitals NHS Foundation Trust</b> |                                                               |
| Norfolk and Norwich University Hospital                              |                                                               |
| Dr Nandu Thalange                                                    | Principal Investigator                                        |
| Dr Chris Upton                                                       | Previous Principal Investigator; Clinician                    |
| Louisa Fear                                                          | Research Nurse                                                |
| <b>North Cumbria University Hospitals NHS Trust</b>                  |                                                               |
| Cumberland Infirmary                                                 |                                                               |
| Dr Glyn Jones                                                        | Principal Investigator                                        |
| <b>North Tees and Hartlepool NHS Foundation Trust</b>                |                                                               |
| University Hospital of North Tees                                    |                                                               |
| Dr Vijay Tandle                                                      | Principal Investigator                                        |
| Gabrielle Osborne                                                    | Research Nurse                                                |
| <b>North West Anglia NHS Foundation Trust</b>                        |                                                               |
| Peterborough City Hospital                                           |                                                               |
| Dr Mona Aslam                                                        | Principal Investigator                                        |
| <b>Northampton General Hospital NHS Trust</b>                        |                                                               |
| Northampton General Hospital                                         |                                                               |
| Dr Imogen Norton                                                     | Principal Investigator                                        |
| <b>Northern Devon Healthcare NHS Trust</b>                           |                                                               |

|                                                             |                                 |
|-------------------------------------------------------------|---------------------------------|
| <b>North Devon District Hospital</b>                        |                                 |
| Dr Dermot Dalton                                            | Principal Investigator          |
| Dr Andrew Arend                                             | Previous Principal Investigator |
| Dr Krishnakumar Thattakkat                                  | Previous Principal Investigator |
| <b>Northern Lincolnshire and Goole NHS Foundation Trust</b> |                                 |
| Diana, Princess of Wales Hospital                           |                                 |
| Dr Bukar Wobi                                               | Principal Investigator          |
| Dr Bemigho Etuwewe                                          | Clinician                       |
| Tara Walker                                                 | Data Manager                    |
| Julie Browning                                              | Research Nurse                  |
| Marjorie Carling                                            | Research Nurse                  |
| Emma Killingbeck                                            | Research Nurse                  |
| Dorothy Ryan                                                | Research Nurse                  |
| Consolata Tsvangirai-Mahachi                                | Research Nurse                  |
| <b>Nottingham University Hospitals NHS Trust</b>            |                                 |
| Nottingham Children's Hospital                              |                                 |
| Dr Andrew Lunn                                              | Principal Investigator          |
| Dr Martin Christian                                         | Clinician                       |
| <b>Oxford University Hospitals NHS Foundation Trust</b>     |                                 |
| John Radcliffe Hospital                                     |                                 |
| Dr Janet Craze                                              | Principal Investigator          |
| <b>Plymouth Hospitals NHS Trust</b>                         |                                 |
| Derriford Hospital                                          |                                 |
| Dr Catherine Derry                                          | Principal Investigator          |
| Dr Robert Jones                                             | Previous Principal Investigator |
| Sarah-Jane Sharman                                          | Research Nurse                  |
| Sally Harwood                                               | Trial Administrator             |
| <b>Poole Hospital NHS Foundation Trust</b>                  |                                 |
| Poole Hospital                                              |                                 |
| Dr Steve Wadams                                             | Principal Investigator          |
| Heather Barham                                              | Research Nurse                  |
| Susan Power                                                 | Research Nurse                  |
| <b>Portsmouth Hospitals NHS Trust</b>                       |                                 |
| Queen Alexandra Hospital                                    |                                 |
| Dr Catherine Tuffrey                                        | Principal Investigator          |
| Dr Simon Birch                                              | Clinician                       |
| Dr Judith Scanlan                                           | Clinician                       |
| Andrew Gribbin                                              | Research Nurse                  |
| Sharon McCready                                             | Research Nurse                  |
| <b>Royal Berkshire NHS Foundation Trust</b>                 |                                 |
| Royal Berkshire Hospital                                    |                                 |
| Dr Ann Gordon                                               | Principal Investigator          |
| Dr Gregory Boden                                            | Previous Principal Investigator |
| Susan Hallett                                               | Research Nurse                  |
| <b>Royal Cornwall Hospitals NHS Trust</b>                   |                                 |
| Royal Cornwall Hospital                                     |                                 |
| Dr Chris Williams                                           | Principal Investigator          |
| Gillian Craig                                               | Research Nurse                  |
| <b>Royal Devon and Exeter Hospital NHS Foundation Trust</b> |                                 |

|                                                                  |                                 |
|------------------------------------------------------------------|---------------------------------|
| <b>Royal Devon and Exeter- Wonford Hospital</b>                  |                                 |
| Dr Hannah Cottis                                                 | Principal Investigator          |
| Dr Vaughan Lewis                                                 | Previous Principal Investigator |
| Dr Christine McMillan                                            | Clinician                       |
| Dr Nigel Osborne                                                 | Clinician                       |
| Caroline Harrill                                                 | Research Nurse                  |
| Suzanne Wilkins                                                  | Research Nurse                  |
| <b>Royal Free London NHS Foundation Trust</b>                    |                                 |
| Royal Free Hospital (non-recruiting centre)                      |                                 |
| Professor Robert Kleta                                           | Laboratory                      |
| <b>Royal United Hospitals Bath NHS Foundation Trust</b>          |                                 |
| Royal United Hospital                                            |                                 |
| Dr Lynn Diskin                                                   | Principal Investigator          |
| Dr Amanda Billson                                                | Previous Principal Investigator |
| Alison Barratt                                                   | Research Nurse                  |
| <b>Sheffield Children's NHS Foundation Trust</b>                 |                                 |
| Sheffield Children's Hospital                                    |                                 |
| Dr Gail Moss                                                     | Principal Investigator          |
| <b>Sherwood Forest Hospitals NHS Foundation Trust</b>            |                                 |
| King's Mill Hospital                                             |                                 |
| Dr Simon Rhodes                                                  | Principal Investigator          |
| Anna Coupe                                                       | Research Officer                |
| Caroline Moulds                                                  | Research Nurse                  |
| <b>Southern Health and Social Care Trust</b>                     |                                 |
| Craigavon Area Hospital                                          |                                 |
| Michael Smith                                                    | Principal Investigator          |
| Sara Gilpin                                                      | Research Nurse                  |
| Judith Ratcliffe                                                 | Research Nurse                  |
| <b>Southport and Ormskirk Hospital NHS Trust</b>                 |                                 |
| Ormskirk and District General Hospital                           |                                 |
| Dr Sharryn Gardner                                               | Principal Investigator          |
| <b>St Helens and Knowsley Teaching Hospitals NHS Trust</b>       |                                 |
| Whiston Hospital                                                 |                                 |
| Dr Lakshmi Chilukuri                                             | Principal Investigator          |
| <b>Stockport NHS Foundation Trust</b>                            |                                 |
| Stepping Hill Hospital                                           |                                 |
| Dr Chris Cooper                                                  | Principal Investigator          |
| Sara Bennett                                                     | Research Nurse                  |
| <b>Tameside and Glossop Integrated Care NHS Foundation Trust</b> |                                 |
| Tameside Hospital                                                |                                 |
| Dr Anjali Petkar                                                 | Principal Investigator          |
| Dr Ahsan Ul-Haq                                                  | Clinician                       |
| Gill Waring                                                      | Research Nurse                  |
| <b>Taunton and Somerset NHS Foundation Trust</b>                 |                                 |
| Musgrove Park Hospital                                           |                                 |
| Dr Rebecca Mann                                                  | Principal Investigator          |
| Nicola Thorne                                                    | Research Nurse                  |
| <b>The Dudley Group NHS Foundation Trust</b>                     |                                 |
| Russells Hall Hospital                                           |                                 |

|                                                                      |                                                      |
|----------------------------------------------------------------------|------------------------------------------------------|
| Dr Zala Ibrahim                                                      | Principal Investigator                               |
| <b>The Ipswich Hospital NHS Trust</b>                                |                                                      |
| Ipswich Hospital                                                     |                                                      |
| Dr Jackie Buck                                                       | Principal Investigator                               |
| Deborah Beeby                                                        | Research Nurse                                       |
| <b>The Leeds Teaching Hospitals NHS Trust</b>                        |                                                      |
| Leeds General Infirmary                                              |                                                      |
| Dr Eric Finlay                                                       | Principal Investigator                               |
| Majorie Allen                                                        | Research Nurse                                       |
| Rebecca Mottram                                                      | Research Nurse                                       |
| <b>The Mid Yorkshire Hospitals NHS Trust</b>                         |                                                      |
| Dewsbury and District Hospital, Pinderfields Hospital                |                                                      |
| Dr Kathryn Deakin                                                    | Principal Investigator                               |
| <b>The Newcastle upon Tyne Hospitals NHS Foundation Trust</b>        |                                                      |
| Great North Children's Hospital                                      |                                                      |
| Dr Sally Johnson                                                     | Principal Investigator                               |
| Dr Yincen Tse                                                        | Clinician                                            |
| Kathryn Bell                                                         | Research Nurse                                       |
| Denise Chisholm                                                      | Clinical Nurse Specialist                            |
| <b>The Pennine Acute Hospitals NHS Trust</b>                         |                                                      |
| North Manchester General Hospital, The Royal Oldham Hospital         |                                                      |
| Dr Beena Padmakumar                                                  | Principal Investigator                               |
| Dr Talaivirichan Magadevan                                           | <b>Clinician (North Manchester General Hospital)</b> |
| <b>The Queen Elizabeth Hospital King's Lynn NHS Foundation Trust</b> |                                                      |
| Queen Elizabeth Hospital                                             |                                                      |
| Dr Mandy Hughes                                                      | Principal Investigator                               |
| Dr Susan Rubin                                                       | Previous Principal Investigator                      |
| Amy Frary                                                            | Research Nurse                                       |
| <b>The Rotherham NHS Foundation Trust</b>                            |                                                      |
| Rotherham Hospital                                                   |                                                      |
| Dr Sanjay Suri                                                       | Principal Investigator                               |
| Dr Sherif El-Refee                                                   | Previous Principal Investigator                      |
| Dr Christine Harrison                                                | Clinician                                            |
| <b>The Royal Wolverhampton NHS Trust</b>                             |                                                      |
| Cannock Chase Hospital, New Cross Hospital                           |                                                      |
| Dr Karen Davies                                                      | Principal Investigator                               |
| Sharon Kempson                                                       | Research Nurse                                       |
| <b>The Shrewsbury and Telford Hospital NHS Trust</b>                 |                                                      |
| Princess Royal Hospital, Royal Shrewsbury Hospital                   |                                                      |
| Dr Naeem Ayub                                                        | Principal Investigator                               |
| <b>United Lincolnshire Hospitals NHS Trust</b>                       |                                                      |
| Lincoln County Hospital, Pilgrim Hospital                            |                                                      |
| Dr Sourabh Mukhopadhyay                                              | Principal Investigator (Lincoln County Hospital)     |
| Dr Margaret Crawford                                                 | Principal Investigator (Pilgrim Hospital)            |
| Dr Mujeeb Pervez                                                     | Previous Principal Investigator (Pilgrim Hospital)   |
| Dr Douglas Thomas                                                    | Clinician (Lincoln County Hospital)                  |

|                                                                     |                                                                   |
|---------------------------------------------------------------------|-------------------------------------------------------------------|
| <b>University Hospital of South Manchester NHS Foundation Trust</b> |                                                                   |
| Wythenshawe Hospital                                                |                                                                   |
| Dr Gopikrishna Vemuri                                               | Principal Investigator                                            |
| Dr Radhika Puttha                                                   | Previous Principal Investigator                                   |
| Dr Alice Setti                                                      | Previous Principal Investigator                                   |
| Dr Faisal Al-Zidgali                                                | Clinician                                                         |
| Claire Holliday                                                     | Research Nurse                                                    |
| Louise Woodhead                                                     | Research Nurse                                                    |
| <b>University Hospital Southampton NHS Foundation Trust</b>         |                                                                   |
| Southampton Children's Hospital                                     |                                                                   |
| Rodney Gilbert                                                      | Principal Investigator                                            |
| <b>University Hospitals Bristol NHS Foundation Trust</b>            |                                                                   |
| Bristol Royal Hospital for Children                                 |                                                                   |
| Professor Moin Saleem                                               | Principal Investigator                                            |
| Dr Alison Kelly                                                     | Clinician                                                         |
| Michelle Ross                                                       | Research Nurse                                                    |
| Heather Smeed                                                       | Research Nurse                                                    |
| <b>University Hospitals Coventry and Warwickshire NHS Trust</b>     |                                                                   |
| University Hospital                                                 |                                                                   |
| Dr Nigel Coad                                                       | Principal Investigator                                            |
| <b>University Hospitals of Leicester NHS Trust</b>                  |                                                                   |
| Leicester Royal Infirmary                                           |                                                                   |
| Dr Angela Hall                                                      | Principal Investigator                                            |
| Dr Peter Houtman                                                    | Previous Principal Investigator                                   |
| <b>University Hospitals of Morecambe Bay NHS Foundation Trust</b>   |                                                                   |
| Furness General Hospital, Royal Lancaster Infirmary                 |                                                                   |
| Dr Nayan Peepah Nardeosingh                                         | Principal Investigator                                            |
| Dr Mireille-Yvette Formosa                                          | Previous Principal Investigator                                   |
| Dr Patrick Ward                                                     | Previous Principal Investigator                                   |
| <b>University Hospitals of North Midlands NHS Trust</b>             |                                                                   |
| County Hospital, Royal Stoke University Hospital                    |                                                                   |
| Dr Yvonne Slater                                                    | Principal Investigator                                            |
| Dr Saeeda Raja                                                      | Previous Principal Investigator (County Hospital)                 |
| Dr Kishor Tewary                                                    | Previous Principal Investigator (County Hospital)                 |
| Dr Shiva Shankar                                                    | Previous Principal Investigator (Royal Stoke University Hospital) |
| <b>Warrington and Halton Hospitals NHS Foundation Trust</b>         |                                                                   |
| Warrington Hospital                                                 |                                                                   |
| Dr Rachel Delyth Webb                                               | Principal Investigator                                            |
| Natalie Rogers                                                      | Research Nurse                                                    |
| <b>West Suffolk NHS Foundation Trust</b>                            |                                                                   |
| West Suffolk Hospital                                               |                                                                   |
| Dr Raman Lakshman                                                   | Principal Investigator                                            |
| Dr Karine Cesar                                                     | Clinician                                                         |
| <b>Western Health and Social Care Trust</b>                         |                                                                   |
| Altnagelvin Area Hospital                                           |                                                                   |
| Dr Damien Armstrong                                                 | Principal Investigator                                            |

|                                                                                                      |                                                     |
|------------------------------------------------------------------------------------------------------|-----------------------------------------------------|
| Julie Brown                                                                                          | Research Nurse                                      |
| <b>Western Sussex Hospitals NHS Foundation Trust</b><br>St Richard's Hospital, Worthing Hospital     |                                                     |
| Dr Nicholas Brennan                                                                                  | Principal Investigator                              |
| Dr Stuart Nicholls                                                                                   | Previous Principal Investigator (Worthing Hospital) |
| <b>Wirral University Teaching Hospital NHS Foundation Trust</b><br>Arrowe Park Hospital              |                                                     |
| Dr Elizabeth Breen                                                                                   | Principal Investigator                              |
| Sharon Hughes                                                                                        | Research Nurse                                      |
| Lucy Lewis                                                                                           | Research Nurse                                      |
| <b>Worcestershire Acute Hospitals NHS Trust</b><br>Alexandra Hospital, Worcestershire Royal Hospital |                                                     |
| Dr John Scanlon                                                                                      | Principal Investigator                              |
| Dr Munir Ahmed                                                                                       | Clinician                                           |
| Dr Andrew Gallagher                                                                                  | Clinician                                           |
| <b>Wrightington, Wigan And Leigh NHS Foundation Trust</b><br>Royal Albert Edward Infirmary           |                                                     |
| Dr Vineeta Joshi                                                                                     | Principal Investigator                              |
| Dr Madhumita Mukherjee                                                                               | Previous Principal Investigator                     |
| Dr Singara Velmurugan                                                                                | Previous Principal Investigator                     |
| <b>Wye Valley NHS Trust</b><br>The County Hospital                                                   |                                                     |
| Dr Simon Meyrick                                                                                     | Principal Investigator                              |
| <b>Yeovil District Hospital NHS Foundation Trust</b><br>Yeovil District Hospital                     |                                                     |
| Dr Michael Fernando                                                                                  | Principal Investigator                              |
| Dr Christopher Zaborowski                                                                            | Clinician                                           |
| Alex Stannett                                                                                        | Research Nurse                                      |
| <b>York Teaching Hospital NHS Foundation Trust</b><br>Scarborough Hospital, The York Hospital        |                                                     |
| Dr Udupa Venkatesh                                                                                   | Principal Investigator (Scarborough Hospital)       |
| Dr Guy Millman                                                                                       | Principal Investigator (The York Hospital)          |
| Simon Dyer                                                                                           | Research Nurse (Scarborough Hospital)               |
| Kerry Elliot                                                                                         | Research Nurse (Scarborough Hospital)               |



## Supplementary References

1. Gordillo, R, Spitzer, A: The nephrotic syndrome. *Pediatr Rev*, 30: 94-104; quiz 105, 2009.
2. Webb, NJ, Frew, E, Brettell, EA, Milford, DV, Bockenbauer, D, Saleem, MA, Christian, M, Hall, AS, Koziell, A, Maxwell, H, Hegde, S, Finlay, ER, Gilbert, RD, Booth, J, Jones, C, McKeever, K, Cook, W, Ives, NJ, group, Ps: Short course daily prednisolone therapy during an upper respiratory tract infection in children with relapsing steroid-sensitive nephrotic syndrome (PREDNOS 2): protocol for a randomised controlled trial. *Trials*, 15: 147, 2014.
3. Noone, DG, Iijima, K, Parekh, R: Idiopathic nephrotic syndrome in children. *Lancet*, 2018.
4. Fairfax, BP, Humburg, P, Makino, S, Naranbhai, V, Wong, D, Lau, E, Jostins, L, Plant, K, Andrews, R, McGee, C, Knight, JC: Innate immune activity conditions the effect of regulatory variants upon monocyte gene expression. *Science*, 343: 1246949, 2014.
5. Fairfax, BP, Makino, S, Radhakrishnan, J, Plant, K, Leslie, S, Dilthey, A, Ellis, P, Langford, C, Vannberg, FO, Knight, JC: Genetics of gene expression in primary immune cells identifies cell type-specific master regulators and roles of HLA alleles. *Nat Genet*, 44: 502-510, 2012.
6. Illumina, I: 'TOP/BOT' strand and 'A/B' allele (Technical Note). 2006.
7. Genome-wide association study of 14,000 cases of seven common diseases and 3,000 shared controls. *Nature*, 447: 661-678, 2007.
8. McCarthy, S, Das, S, Kretzschmar, W, Delaneau, O, Wood, AR, Teumer, A, Kang, HM, Fuchsberger, C, Danecek, P, Sharp, K, Luo, Y, Sidore, C, Kwong, A, Timpson, N, Koskinen, S, Vrieze, S, Scott, LJ, Zhang, H, Mahajan, A, Veldink, J, Peters, U, Pato, C, van Duijn, CM, Gillies, CE, Gandin, I, Mezzavilla, M, Gilly, A, Cocca, M, Traglia, M, Angius, A, Barrett, JC, Boomsma, D, Branham, K, Breen, G, Brummett, CM, Busonero, F, Campbell, H, Chan, A, Chen, S, Chew, E, Collins, FS, Corbin, LJ, Smith, GD, Dedoussis, G, Dorr, M, Farmaki, AE, Ferrucci, L, Forer, L, Fraser, RM, Gabriel, S, Levy, S, Groop, L, Harrison, T, Hattersley, A, Holmen, OL, Hveem, K, Kretzler, M, Lee, JC, McGue, M, Meitinger, T, Melzer, D, Min, JL, Mohlke, KL, Vincent, JB, Nauck, M, Nickerson, D, Palotie, A, Pato, M, Pirastu, N, McInnis, M, Richards, JB, Sala, C, Salomaa, V, Schlessinger, D, Schoenherr, S, Slagboom, PE, Small, K, Spector, T, Stambolian, D, Tuke, M, Tuomilehto, J, Van den Berg, LH, Van Rheenen, W, Volker, U, Wijmenga, C, Toniolo, D, Zeggini, E, Gasparini, P, Sampson, MG, Wilson, JF, Frayling, T, de Bakker, PI, Swertz, MA, McCarroll, S, Kooperberg, C, Dekker, A, Altshuler, D, Willer, C, Iacono, W, Ripatti, S, Soranzo, N, Walter, K, Swaroop, A, Cucca, F, Anderson, CA, Myers, RM, Boehnke, M, McCarthy, MI, Durbin, R, Haplotype Reference, C: A reference panel of 64,976 haplotypes for genotype imputation. *Nat Genet*, 48: 1279-1283, 2016.
9. Hamed, RM, Shomaf, M: Congenital nephrotic syndrome: a clinico-pathologic study of thirty children. *J Nephrol*, 14: 104-109, 2001.
10. Bozeman, M: SNP & Variation Suite™ (Version 8.8.1). Golden Helix, Inc.
11. Staples, J, Qiao, D, Cho, MH, Silverman, EK, University of Washington Center for Mendelian, G, Nickerson, DA, Below, JE: PRIMUS: rapid reconstruction of pedigrees from genome-wide estimates of identity by descent. *Am J Hum Genet*, 95: 553-564, 2014.
12. Staples, J, Nickerson, DA, Below, JE: Utilizing graph theory to select the largest set of unrelated individuals for genetic analysis. *Genet Epidemiol*, 37: 136-141, 2013.

13. Browning, BL, Zhou, Y, Browning, SR: A One-Penny Imputed Genome from Next-Generation Reference Panels. *Am J Hum Genet*, 103: 338-348, 2018.
14. Chang, CC, Chow, CC, Tellier, LC, Vattikuti, S, Purcell, SM, Lee, JJ: Second-generation PLINK: rising to the challenge of larger and richer datasets. *Gigascience*, 4: 7, 2015.
15. McCarthy, MI, Abecasis, GR, Cardon, LR, Goldstein, DB, Little, J, Ioannidis, JP, Hirschhorn, JN: Genome-wide association studies for complex traits: consensus, uncertainty and challenges. *Nat Rev Genet*, 9: 356-369, 2008.
16. Jia, X, Han, B, Onengut-Gumuscu, S, Chen, WM, Concannon, PJ, Rich, SS, Raychaudhuri, S, de Bakker, PI: Imputing amino acid polymorphisms in human leukocyte antigens. *PLoS One*, 8: e64683, 2013.
17. Consortium, GT: The Genotype-Tissue Expression (GTEx) project. *Nat Genet*, 45: 580-585, 2013.
18. Võsa, U, Claringbould, A, Westra, H-J, Bonder, MJ, Deelen, P, Zeng, B, Kirsten, H, Saha, A, Kreuzhuber, R, Kasela, S, Pervjakova, N, Alvaes, I, Fave, M-J, Agbessi, M, Christiansen, M, Jansen, R, Seppälä, I, Tong, L, Teumer, A, Schramm, K, Hemani, G, Verlouw, J, Yaghootkar, H, Sönmez, R, Andrew, AA, Kukushkina, V, Kalnapenkis, A, Rüeger, S, Porcu, E, Kronberg-Guzman, J, Kettunen, J, Powell, J, Lee, B, Zhang, F, Arindrarto, W, Beutner, F, Brugge, H, Dmitrieva, J, Elansary, M, Fairfax, BP, Georges, M, Heijmans, BT, Kähönen, M, Kim, Y, Knight, JC, Kovacs, P, Krohn, K, Li, S, Loeffler, M, Marigorta, UM, Mei, H, Momozawa, Y, Müller-Nurasyid, M, Nauck, M, Nivard, M, Penninx, B, Pritchard, J, Raitakari, O, Rotzschke, O, Slagboom, EP, Stehouwer, CDA, Stumvoll, M, Sullivan, P, 't Hoen, PAC, Thiery, J, Tönjes, A, van Dongen, J, van Iterson, M, Veldink, J, Völker, U, Wijmenga, C, Swertz, M, Andiappan, A, Montgomery, GW, Ripatti, S, Perola, M, Kutalik, Z, Dermitzakis, E, Bergmann, S, Frayling, T, van Meurs, J, Prokisch, H, Ahsan, H, Pierce, B, Lehtimäki, T, Boomsma, D, Psaty, BM, Gharib, SA, Awadalla, P, Milani, L, Ouwehand, WH, Downes, K, Stegle, O, Battle, A, Yang, J, Visscher, PM, Scholz, M, Gibson, G, Esko, T, Franke, L: Unraveling the polygenic architecture of complex traits using blood eQTL meta-analysis. *bioRxiv*: 447367, 2018.
19. Gillies, CE, Putler, R, Menon, R, Otto, E, Yasutake, K, Nair, V, Hoover, P, Lieb, D, Li, S, Eddy, S, Fermin, D, McNulty, MT, Nephrotic Syndrome Study, N, Hacoheh, N, Kiryluk, K, Kretzler, M, Wen, X, Sampson, MG: An eQTL Landscape of Kidney Tissue in Human Nephrotic Syndrome. *Am J Hum Genet*, 103: 232-244, 2018.
20. Qiu, C, Huang, S, Park, J, Park, Y, Ko, YA, Seasock, MJ, Bryer, JS, Xu, XX, Song, WC, Palmer, M, Hill, J, Guarnieri, P, Hawkins, J, Boustany-Kari, CM, Pullen, SS, Brown, CD, Susztak, K: Renal compartment-specific genetic variation analyses identify new pathways in chronic kidney disease. *Nat Med*, 24: 1721-1731, 2018.
21. Jostins, L, Levine, AP, Barrett, JC: Using genetic prediction from known complex disease Loci to guide the design of next-generation sequencing experiments. *PLoS One*, 8: e76328, 2013.
22. Skol, AD, Scott, LJ, Abecasis, GR, Boehnke, M: Joint analysis is more efficient than replication-based analysis for two-stage genome-wide association studies. *Nat Genet*, 38: 209-213, 2006.
23. Jia, X, Horinouchi, T, Hitomi, Y, Shono, A, Khor, SS, Omae, Y, Kojima, K, Kawai, Y, Nagasaki, M, Kaku, Y, Okamoto, T, Ohwada, Y, Ohta, K, Okuda, Y, Fujimaru, R, Hatae, K, Kumagai, N,

- Sawanobori, E, Nakazato, H, Ohtsuka, Y, Nakanishi, K, Shima, Y, Tanaka, R, Ashida, A, Kamei, K, Ishikura, K, Nozu, K, Tokunaga, K, Iijima, K, and for the Research Consortium on Genetics of Childhood Idiopathic Nephrotic Syndrome in, J: Strong Association of the HLA-DR/DQ Locus with Childhood Steroid-Sensitive Nephrotic Syndrome in the Japanese Population. *J Am Soc Nephrol*, 2018.
24. Debiec, H, Dossier, C, Letouze, E, Gillies, CE, Vivarelli, M, Putler, RK, Ars, E, Jacqz-Aigrain, E, Elie, V, Colucci, M, Debette, S, Amouyel, P, Elalaoui, SC, Sefiani, A, Dubois, V, Simon, T, Kretzler, M, Ballarin, J, Emma, F, Sampson, MG, Deschenes, G, Ronco, P: Transethnic, Genome-Wide Analysis Reveals Immune-Related Risk Alleles and Phenotypic Correlates in Pediatric Steroid-Sensitive Nephrotic Syndrome. *J Am Soc Nephrol*, 29: 2000-2013, 2018.

## Supplementary Tables

**Supplementary Table 1: Effect estimates for the three lead genotyped SNPs at the associated loci**

| Locus  | SNP        | Minor allele | MAF cases | MAF controls | p-value                |
|--------|------------|--------------|-----------|--------------|------------------------|
| 6p21.3 | rs479536   | T            | 0.22      | 0.07         | $1.87 \times 10^{-47}$ |
|        | rs4947342  | A            | 0.45      | 0.24         | $4.90 \times 10^{-42}$ |
|        | rs9501626  | A            | 0.27      | 0.11         | $3.70 \times 10^{-39}$ |
| 6q22.1 | rs549262   | A            | 0.30      | 0.40         | $4.30 \times 10^{-9}$  |
|        | rs648210   | G            | 0.33      | 0.43         | $8.73 \times 10^{-9}$  |
|        | rs4142087  | C            | 0.32      | 0.40         | $1.04 \times 10^{-6}$  |
| 4q13.3 | rs9090     | T            | 0.13      | 0.08         | $6.13 \times 10^{-7}$  |
|        | rs1043633  | T            | 0.13      | 0.08         | $1.03 \times 10^{-6}$  |
|        | rs11098369 | T            | 0.23      | 0.18         | $1.42 \times 10^{-4}$  |

Minor allele frequencies (MAF) and p-values of the three lead genotyped SNPs for each locus reaching significance in the imputed dataset.

Standard filtering steps with a call rate cut off of 97% for markers was used for quality control. Basic allele test was used for association testing.

**Supplementary Table 2: Linkage equilibrium at the Chromosome 4q13.3 locus**

|                       | European            |                     | African             |                     |
|-----------------------|---------------------|---------------------|---------------------|---------------------|
|                       | D'                  | r <sup>2</sup>      | D'                  | r <sup>2</sup>      |
| D'/r <sup>2</sup>     | rs59882675<br>(BTC) | rs59882675<br>(BTC) | rs59882675<br>(BTC) | rs59882675<br>(BTC) |
| rs10518133<br>(PARM1) | 0.1983              | 0.0004              | 0.0414              | 0.0004              |

Shown are values for the normalized coefficient of linkage disequilibrium (D') and the coefficient of correlation (r<sup>2</sup>) for the lead SNP at the chromosome 4q13.3 locus in our study (rs10518133) and the lead SNP identified at this locus by Debiec *et al.* (rs59882675). Note that linkage equilibrium is seen with reference data from European, as well as African ancestries, suggesting that these SNPs are independent. Reference data were pulled from the 1000 genome project (phase 3 version 5; <https://www.genome.gov/27528684/1000-genomes-project/>) using all European (CEU, TSI, FIN, GBR, IBS) or African (YRI, LWK, GWD, MSL, ESN, ASW, ACB) population data.

**Supplementary Table 3: List of SNPs with a suggestive association**

| Locus    | SNP         | Minor allele | MAF cases | MAF controls | OR   | 95% CI    | p-value  |
|----------|-------------|--------------|-----------|--------------|------|-----------|----------|
| 1q32.1   | rs113752715 | G            | 0.04      | 0.08         | 0.47 | 0.33-0.66 | 1.62e-06 |
| 3q21.1   | rs530462    | T            | 0.15      | 0.21         | 0.63 | 0.52-0.77 | 2.63e-06 |
| 3q25.1   | rs6763024   | C            | 0.34      | 0.27         | 1.41 | 1.21-1.63 | 8.89e-06 |
| 3q27.2   | rs487575    | T            | 0.15      | 0.22         | 0.63 | 0.52-0.77 | 1.27e-06 |
| 4p14     | rs6531527   | G            | 0.46      | 0.38         | 1.38 | 1.20-1.58 | 6.74e-06 |
| 6q16.1   | rs2674382   | T            | 0.33      | 0.07         | 0.46 | 0.32-0.68 | 9.15e-06 |
| 6q23.2   | rs2746419   | A            | 0.55      | 0.46         | 1.42 | 1.23-1.63 | 1.08e-06 |
| 7p14.1   | rs111796602 | C            | 0.16      | 0.10         | 1.63 | 1.34-1.99 | 3.31e-06 |
| 9p23     | rs201899638 | C            | 0.004     | 0.02         | 0.11 | 0.03-0.40 | 4.96e-07 |
| 10p11.22 | rs1891621   | G            | 0.55      | 0.47         | 1.39 | 1.21-1.60 | 3.56e-06 |
| 19q13.12 | rs34217742  | A            | 0.18      | 0.12         | 1.56 | 1.29-1.88 | 7.64e-06 |

Listed are lead SNPs from loci achieving suggestive genome-wide significance with a p-value between  $5 \times 10^{-8}$  and  $1 \times 10^{-5}$ . Minor allele frequency (MAF) and odds ratio (OR) with 95% confidence intervals (95% CI).

## Supplementary Figures

**Supplementary Figure 1. Flowchart of quality control steps and GWAS**

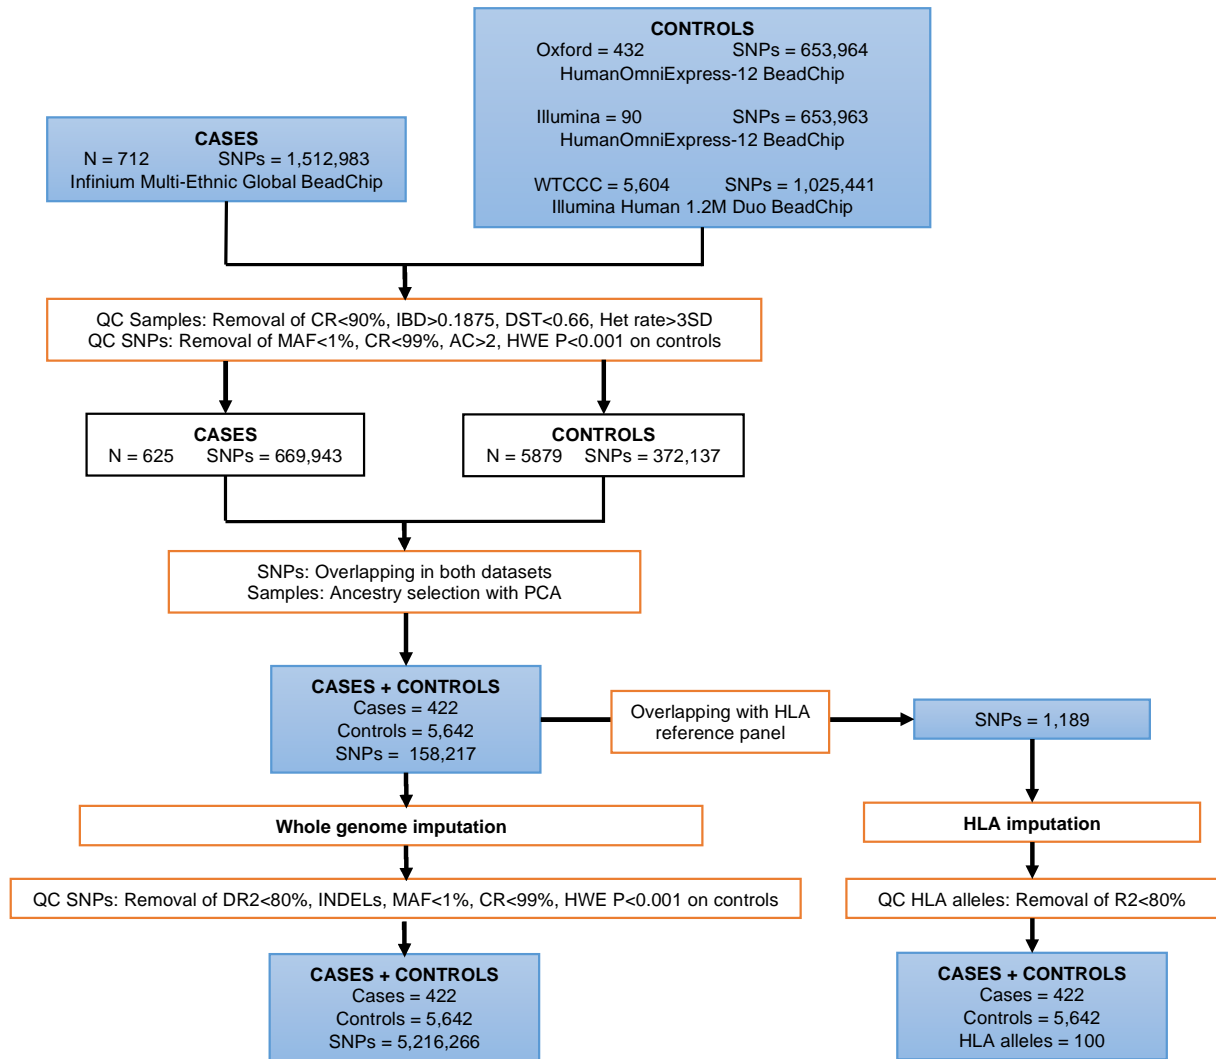

Shown is a flowchart providing information on data input and processing. QC: quality control; CR: call rate; IBD: identity by descent; DST: identity by state distance; Het rate: heterozygosity rate; MAF: minor allele frequency; HWE: Hardy-Weinberg equilibrium.

**Supplementary Figure 2. Results of classical HLA type association analysis**

A)

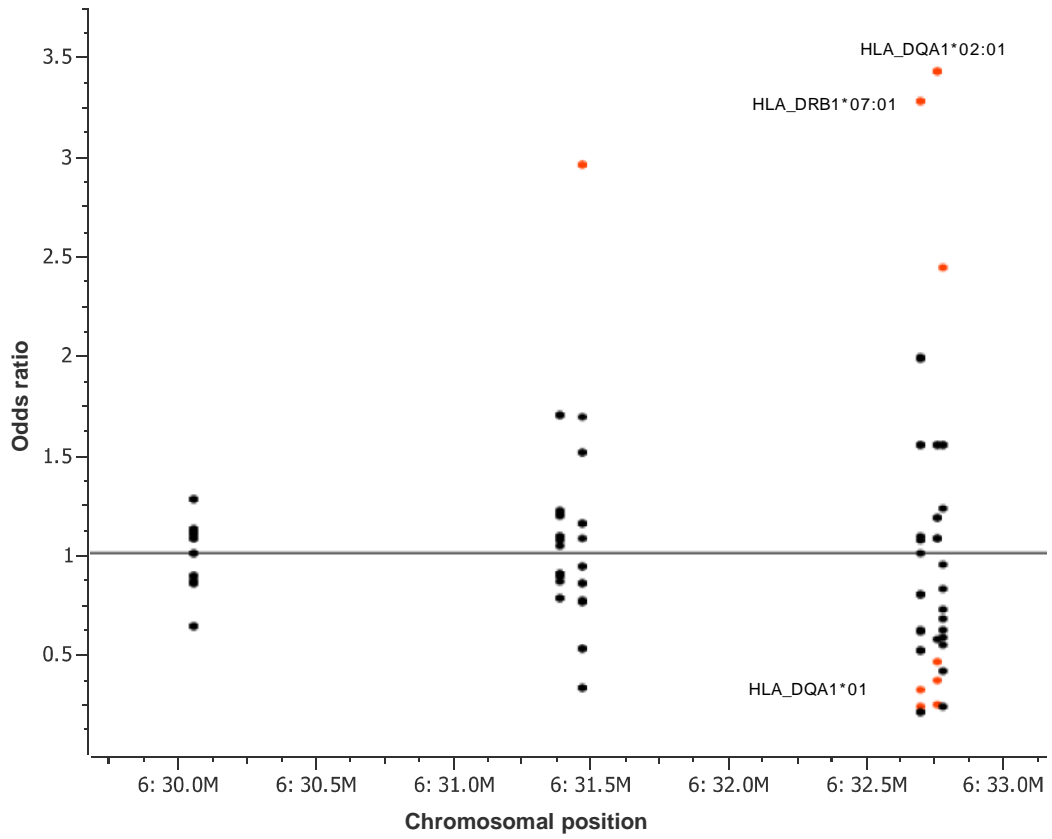



B)

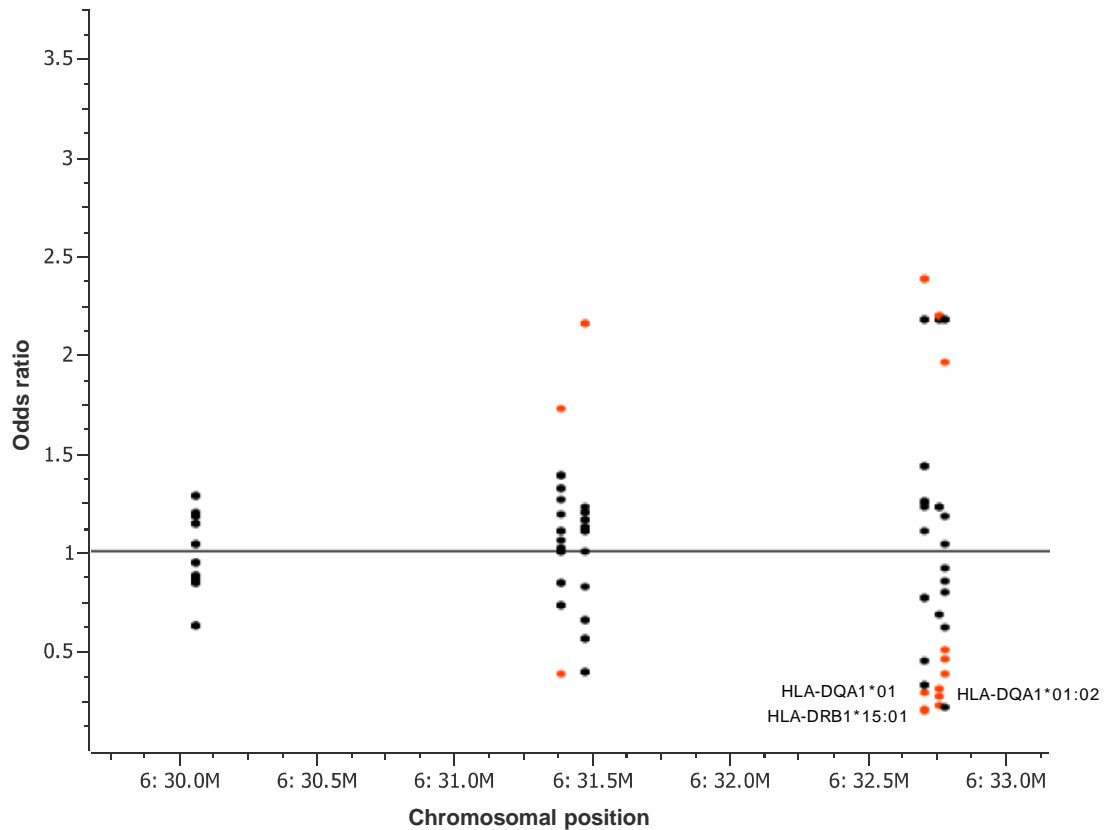

- A) Results for HLA allele imputation for HLA class I (HLA-A, -C and -B) and class II (HLA-DRB1, -DQB1) genes. Shown are the odds ratios (OR) for classical HLA alleles on Y-axis and chromosomal position on X-axis. HLA alleles with an OR > 1 are deemed to be disease causing versus HLA alleles with an OR < 1 deemed to be protective. Significantly associated HLA alleles are colored in red (p-value < 5x10<sup>-8</sup>). Indicated are the three HLA alleles with the lowest p-value for the independent association with risk for SSNS.
- B) Same as A), but after conditioning on HLA-DQA1\*02:01. Note that the protective allele HLA-DQA1\*01 is essentially unchanged, indicating that its effect is independent of HLA-DQA1\*02:01.

### Supplementary figure 3. Locus Zoom plot of the association on chromosome 4

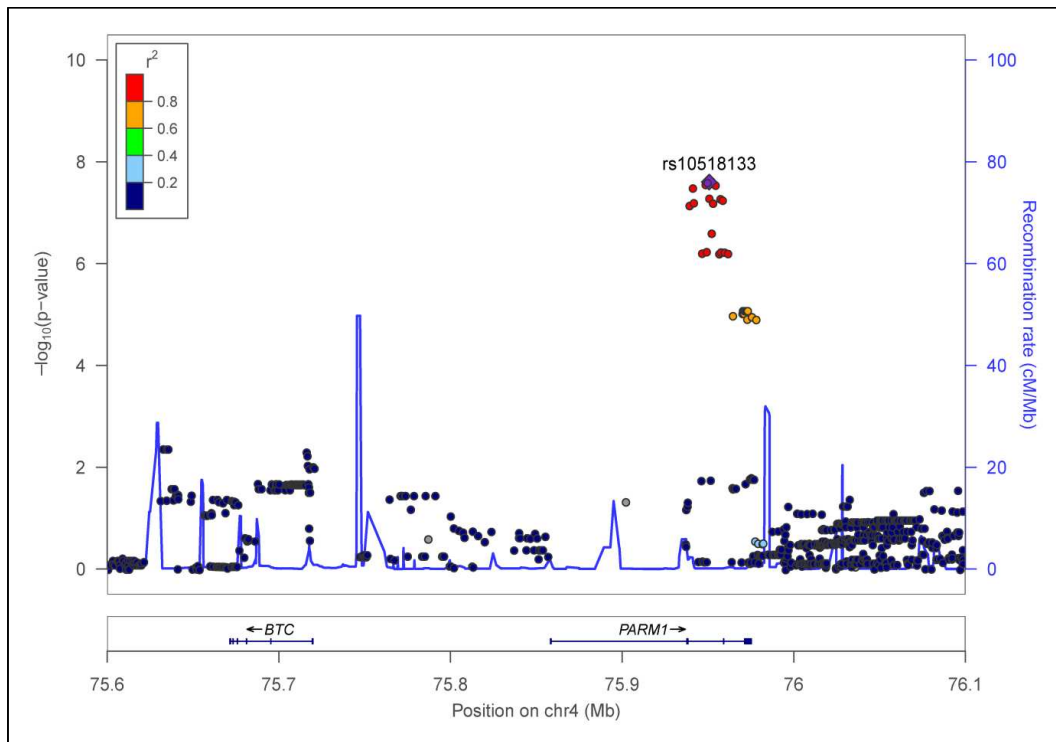

X-axis indicates chromosomal position, the left Y-axis the log-transformed p-value and the right Y-axis the recombination rate. The purple dot indicates the top SNP for each region. Recombination hotspots indicated by blue lines. The purple diamond indicates SNP with the smallest p-value within each region. SNPs are colored based on their pairwise LD to the lead SNP as per 1000 Genomes European reference data, according to the key. Recombination hotspots are indicated by blue lines. Data are shown for 200 kb either side of the lead SNP.

Note that *PARM1* and *BTC* are approximately 150 kb apart and separated by a strong recombination hotspot ( $> 50\text{cM/Mb}$ ).

Supplementary Figure 4. Principal component analysis of cases and controls

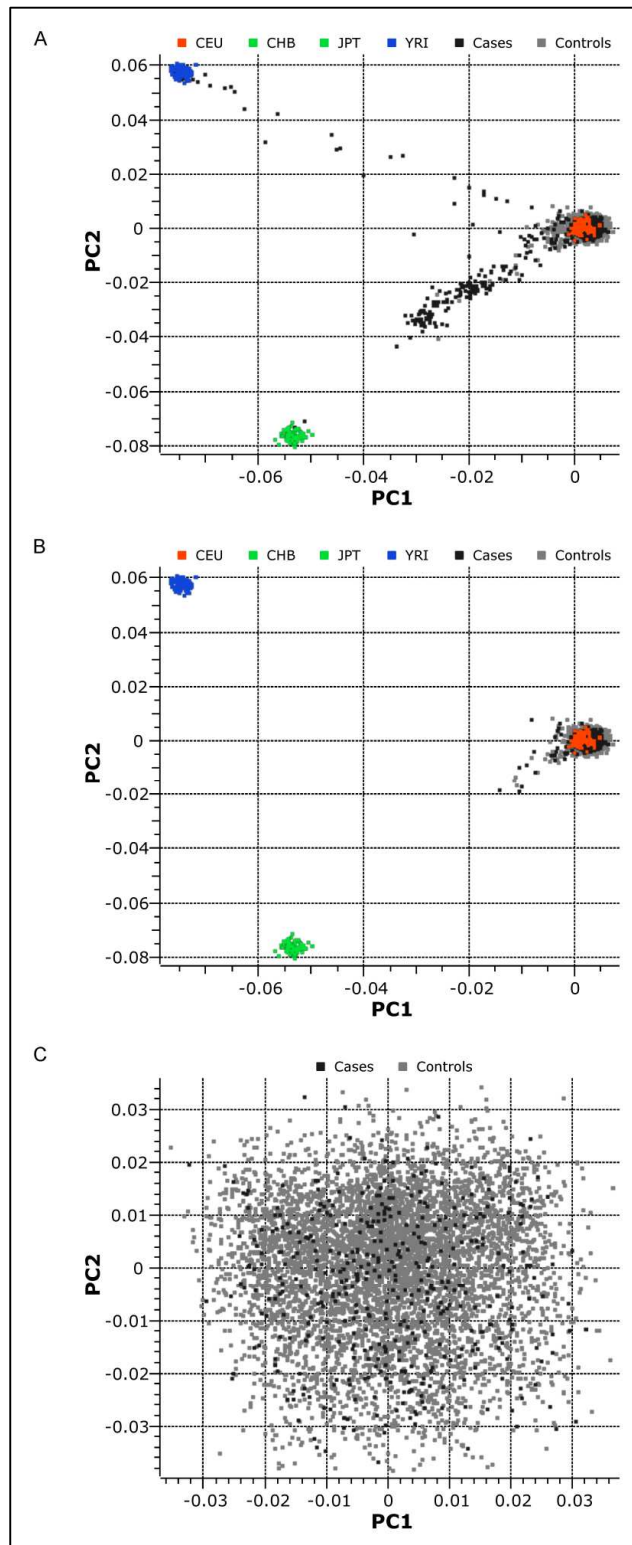

Shown is the principal component analysis.

A) Prior to the exclusion of non-European individuals. Distribution of cases samples along the top two principal components (PC1 and PC2) identified by principal component analysis of 687 cases and 5,879 controls. The results are visualized in comparison to the Illumina ethnicity controls (CEU, YRI and CHB-JPT) for panels A and B.

B) and C) Distribution of remaining European 422 cases and 5,642 controls after removal of cases and controls with principal components of more than 3 standard deviations from the mean. Panel C is a zoomed in image of panel B without the Illumina ethnicity controls. Inflation factor  $\lambda = 1.027$ .

### Supplementary Figure 5. Manhattan plot with genotyped markers only

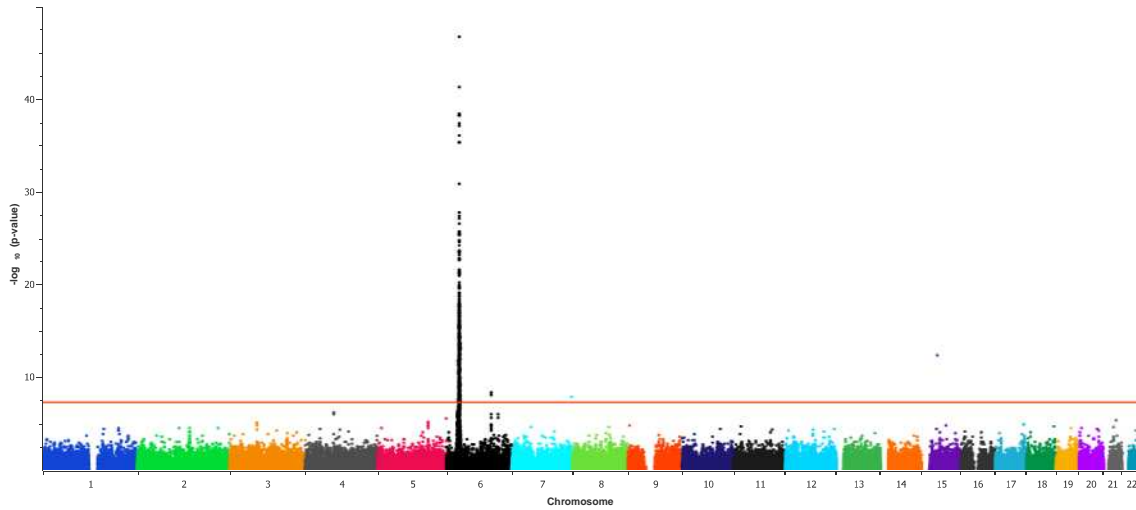

Shown is the Manhattan plot for the analysis with the 158,217 directly genotyped SNPs. Note that the same three peaks are seen, as in the analysis with the imputed dataset (Figure 1), although the peak on chromosome 4 is not significant with genotyped markers only. Same QC criteria were used as in the full analysis, except for a cut-off for the CR of  $<0.97$ .

**Supplementary Figure 6. Locus zoom plot with genotyped markers only for the HLA locus**

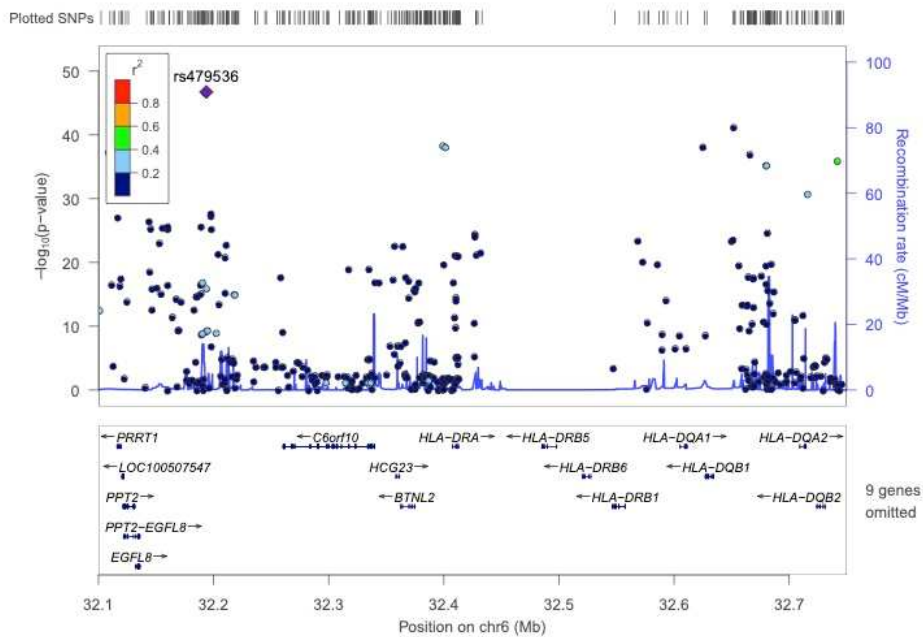

Shown is the locus zoom plot for the HLA locus with genotyped markers only. Note that the SNP with the lowest p-value (rs479536) is approximately 0.4 Mb telomeric to the peak over *HLA-DQB1*, seen with the imputed analysis. However, the SNP with the second lowest p-Value (rs4947342, upstream of *HLA-DQB1*, not annotated) is within the peak identified in the imputed analysis.

**Supplementary Figure 7. Locus zoom plot with genotyped markers only for the *CALHM6* locus**

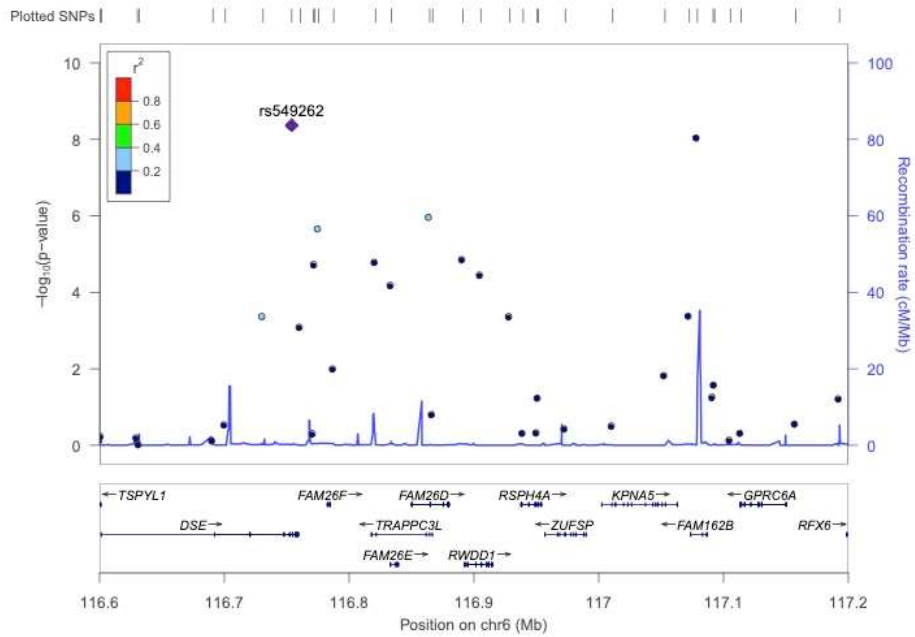

Shown is the locus zoom plot for the peak on chromosome 6q22.1 with genotyped markers only. Note that the SNP with the lowest p-Value (rs549262) is in the same peak over *CALHM6* (here annotated with the old name *FAM26F*), identified in the imputed analysis.

**Supplementary Figure 8. Locus zoom plot with genotyped markers only for the chr. 4q13.3 locus**

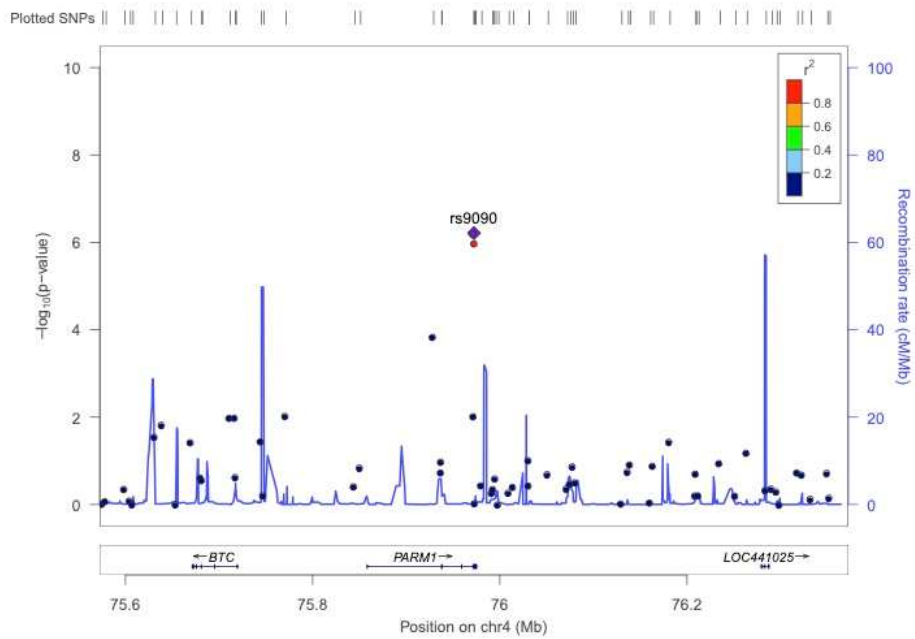

Shown is the locus zoom plot for the peak on chromosome 4q13.3 with genotyped markers only. Note that the SNP with the lowest p-Value (rs9090) is in the same peak over *PARM1*, identified in the imputed analysis.



**Supplementary Figure 9: Linkage Disequilibrium of SNP in the HLA region associated with SSNS**

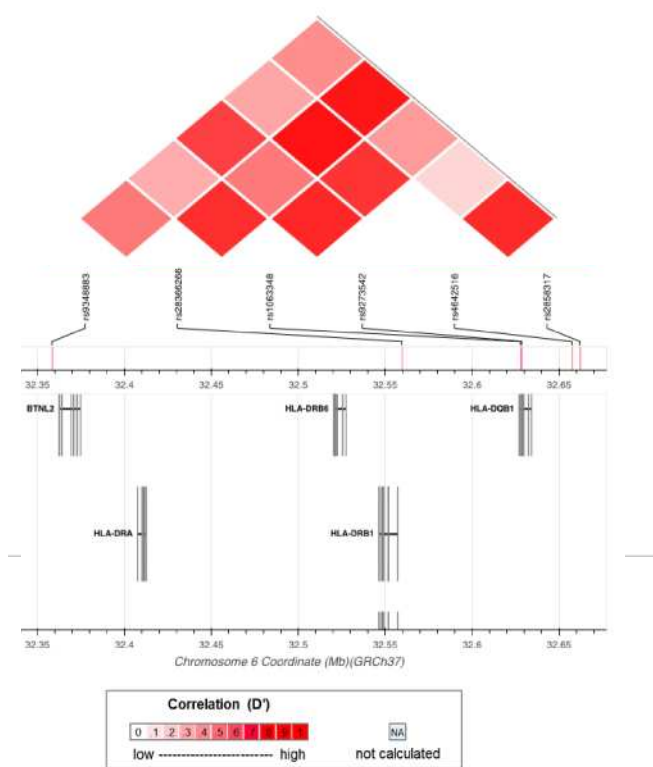

Shown is the LD data for the lead HLA SNPs identified in previous GWAS of SSNS and this analysis, based on European reference data from the 1000 genome dataset. Note that the SNPs rs9273542 and rs2858317, identified in this analysis are in strong LD with rs4642516, identified by Jia *et al.*<sup>23</sup> and with two markers, rs1063348 and rs28366266, identified by Debiec *et al.*<sup>24</sup> In contrast, the third, most telomeric marker identified by Debiec *et al.* rs9348883 is only in weak LD with the other markers.

## Summary Statistics

Due to the large file size (spreadsheet with >5.000.000 rows), this is provided as a separate document (SSNSSummaryStatistics.csv). Each row contains information for one of the 5,216,266 SNP analysed. The column headers indicate the information provided. Columns 1-6 contain general information about the respective SNP from dbSNP ([www.ncbi.nlm.nih.gov/snp](http://www.ncbi.nlm.nih.gov/snp)), whereas columns 7-10 contain information derived from our analysis.

Column 1 “rsid”: SNP identifier

Column 2 “chromosome”: name of chromosome on which the SNP is located

Column 3: “position”: base pair position on the chromosome

Column 4 “minor\_test\_allele”: the base that constitutes the minor allele

Column 5 “major\_allele”: the base that constitutes the major allele

Column 6 “maf”: the frequency of the minor allele, indicated as a fraction of 1

Column 7 “allele\_freq\_cases”: the minor allele frequency in cases

Column 8 “allele\_freq\_controls”: the minor allele frequency in controls

Column 9 “regression\_pvalue”: the p-value for the difference in allele frequency between cases and controls

Column 10 “odds\_ratio”: the odds ratio, as calculated using logistic regression under an additive model with adjustment for the first ten principal components of ancestry

This data will be deposited with the European Genome-phenome Archive (EGA) (<https://ega-archive.org/>) and is available through collaboration / corresponding authors.
